# Supplementary material for: Quantitative assessment of TIM-3 polymorphisms and cancer risk in Chinese Han population
Source: PubMed Central journal article supplement (PMC5094960; doi:10.18632/oncotarget.8157), 2016-03-17
Supplement: oncotarget-07-35768-s001.pdf [file oncotarget-07-35768-s001.pdf]

# **Quantitative assessment of TIM-3 polymorphisms and cancer risk in Chinese Han population**

**Supplementary Material**

Table S1: Genotype and allele frequencies of *TIM-3* polymorphisms in cases and controls.

| Polymorphisms  | First author | Year | Cancer system           | Cases |    |    |     |    | Controls |    |    |      |    | $P_{HWE}$ |
|----------------|--------------|------|-------------------------|-------|----|----|-----|----|----------|----|----|------|----|-----------|
|                |              |      |                         | GG    | GT | TT | G   | T  | GG       | GT | TT | G    | T  |           |
| TIM-3 -1516G/T | Song, H.     | 2013 | Other cancer            | 411   | 85 | 0  | 907 | 85 | 432      | 80 | 0  | 944  | 80 | 0.06      |
|                | Li, Z.       | 2013 | Digestive system cancer | 216   | 52 | 3  | 484 | 58 | 290      | 27 | 1  | 607  | 29 | 0.66      |
|                | Bai, J.      | 2013 | Other cancer            | 359   | 73 | 0  | 791 | 73 | 401      | 65 | 0  | 867  | 65 | 0.11      |
|                | Tong, D.     | 2012 | Digestive system cancer | 256   | 50 | 0  | 562 | 50 | 360      | 62 | 0  | 782  | 62 | 0.1       |
|                | Cai, C.      | 2012 | Other cancer            | 268   | 54 | 0  | 590 | 54 | 342      | 60 | 0  | 744  | 60 | 0.11      |
|                | Cao, B.      | 2010 | Digestive system cancer | 176   | 34 | 2  | 386 | 38 | 229      | 23 | 0  | 481  | 23 | 0.45      |
| TIM-3 -574G/T  | Song, H.     | 2013 | Other cancer            | 456   | 40 | 0  | 952 | 40 | 496      | 16 | 0  | 1008 | 16 | 0.72      |
|                | Bai, J.      | 2013 | Other cancer            | 405   | 27 | 0  | 837 | 27 | 443      | 23 | 0  | 909  | 23 | 0.58      |
|                | Tong, D.     | 2012 | Digestive system cancer | 290   | 16 | 0  | 596 | 16 | 407      | 15 | 0  | 829  | 15 | 0.71      |
|                | Li, Z.       | 2012 | Digestive system cancer | 141   | 3  | 0  | 285 | 3  | 177      | 5  | 0  | 359  | 5  | 0.85      |
|                | Cai, C.      | 2012 | Other cancer            | 294   | 28 | 0  | 616 | 28 | 389      | 13 | 0  | 791  | 13 | 0.74      |
|                | Cao, B.      | 2010 | Digestive system cancer | 192   | 20 | 0  | 404 | 20 | 243      | 9  | 0  | 495  | 9  | 0.77      |
| TIM-3 +4259T/G | Song, H.     | 2013 | Other cancer            | 451   | 45 | 0  | 947 | 45 | 493      | 19 | 0  | 1005 | 19 | 0.67      |
|                | Bai, J.      | 2013 | Other cancer            | 385   | 47 | 0  | 817 | 47 | 447      | 19 | 0  | 913  | 19 | 0.65      |
|                | Tong, D.     | 2012 | Digestive system cancer | 279   | 27 | 0  | 585 | 27 | 408      | 14 | 0  | 830  | 14 | 0.73      |
|                | Li, Z.       | 2012 | Digestive system cancer | 143   | 1  | 0  | 287 | 1  | 178      | 4  | 0  | 360  | 4  | 0.88      |
|                | Cai, C.      | 2012 | Other cancer            | 292   | 30 | 0  | 614 | 30 | 390      | 12 | 0  | 792  | 12 | 0.76      |
|                | Cao, B.      | 2010 | Digestive system cancer | 174   | 38 | 0  | 386 | 38 | 213      | 39 | 0  | 465  | 39 | 0.18      |

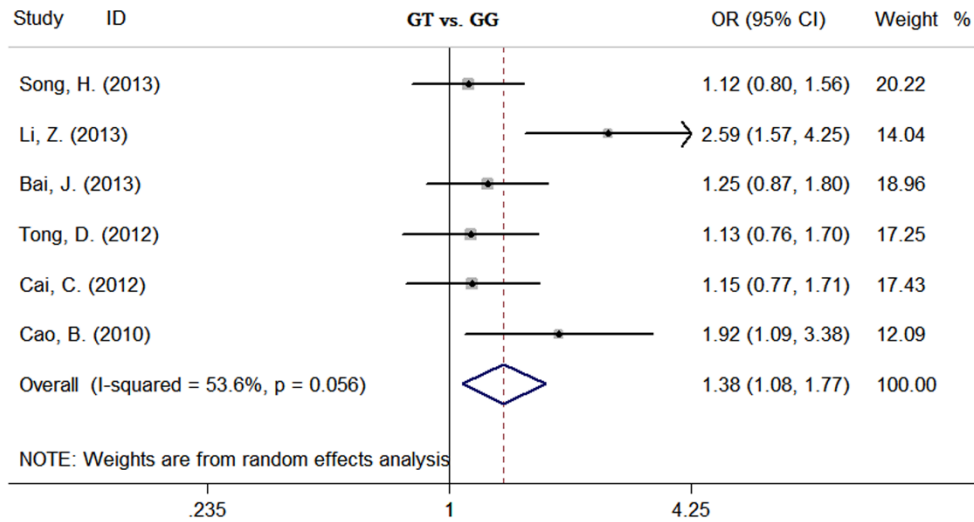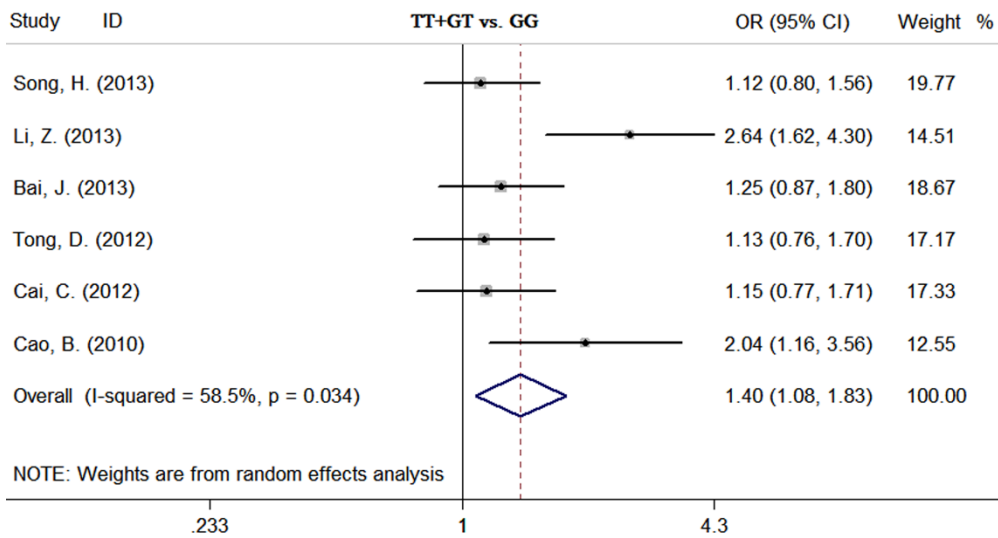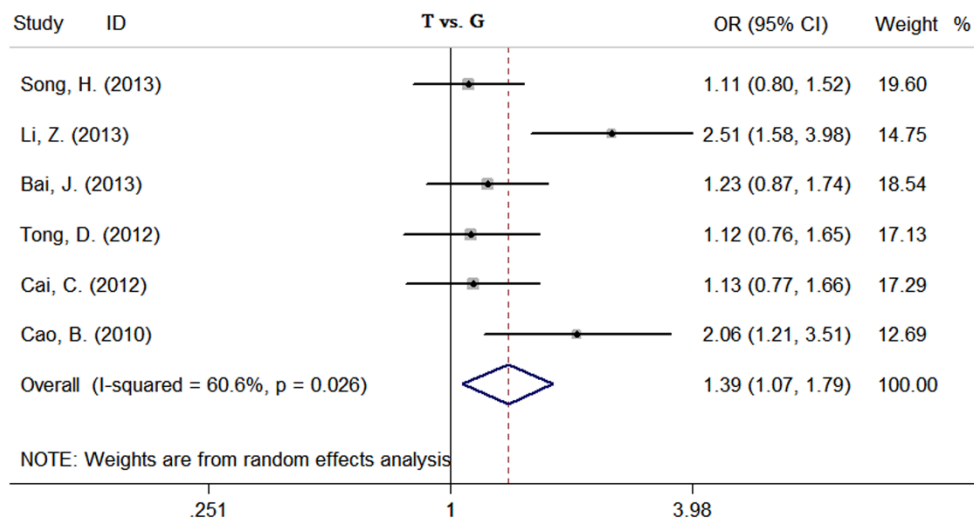

Figure S1: Forest plot of effect estimates for *TIM-3* -1516G/T polymorphism and overall cancer risk.

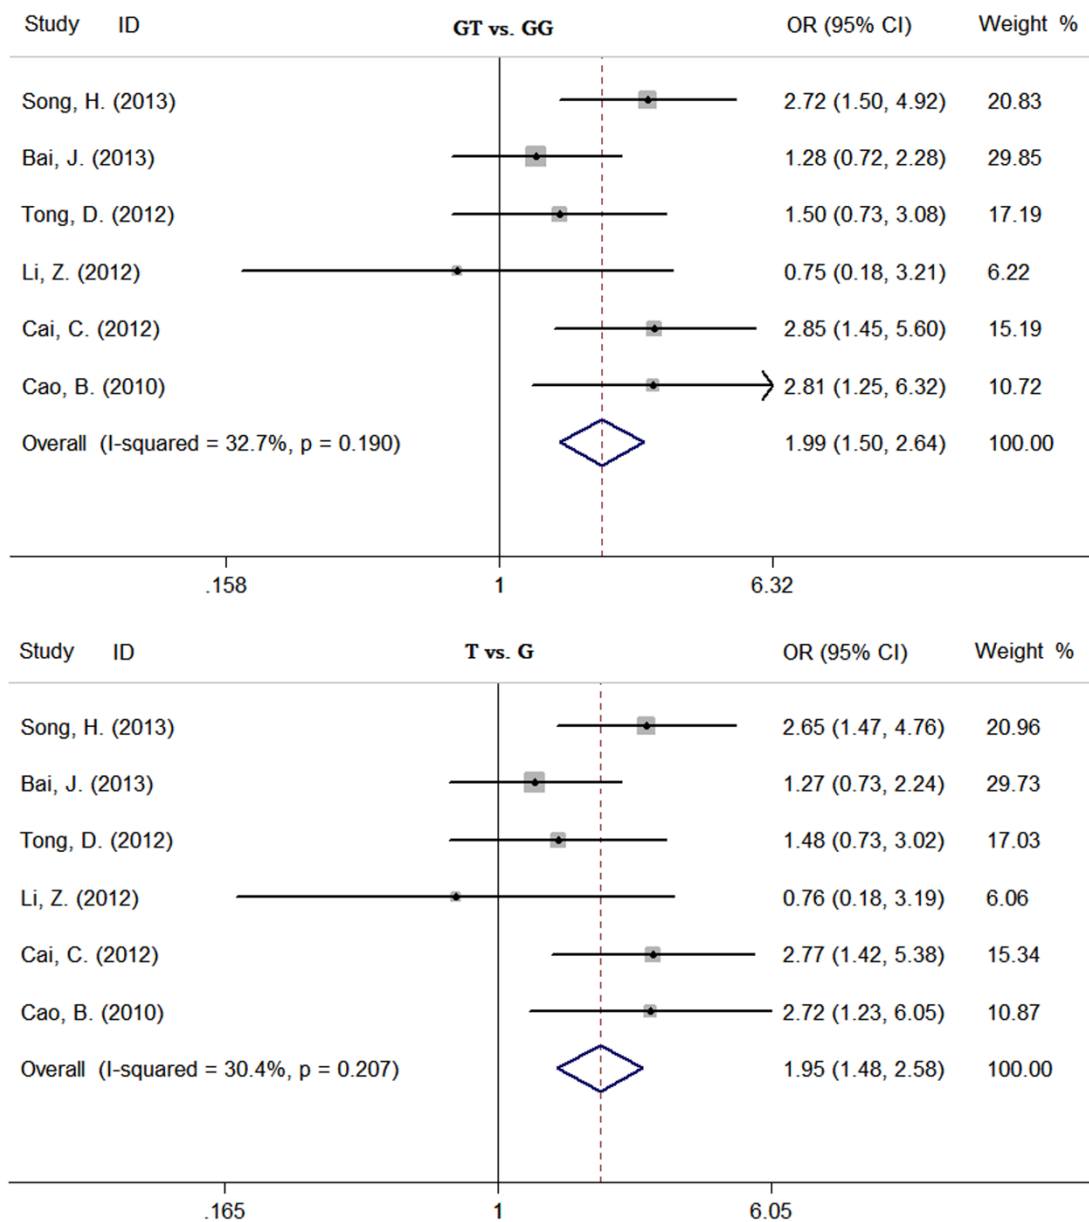

Figure S2: Forest plot of effect estimates for *TIM-3* -574G/T polymorphism and overall cancer risk.

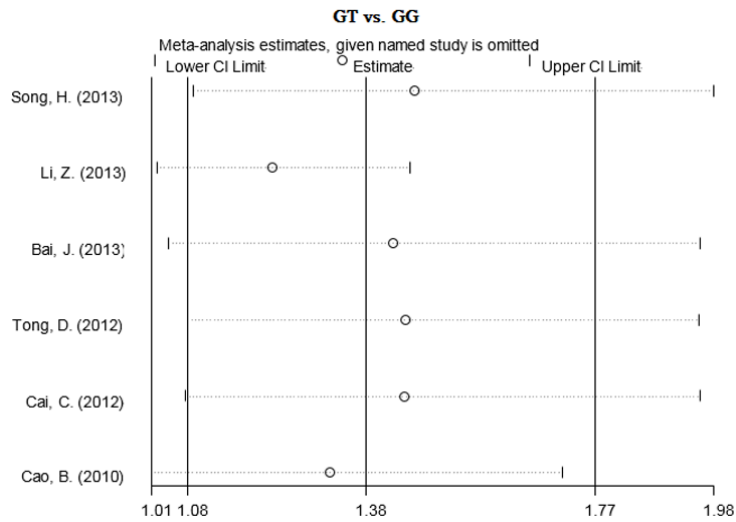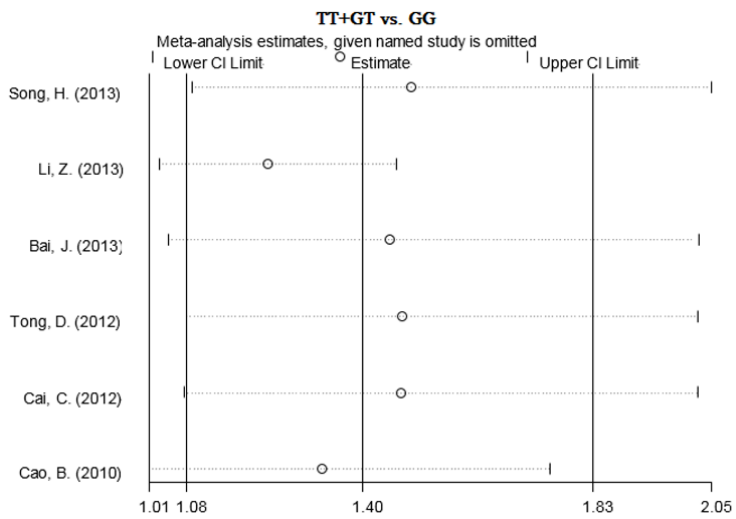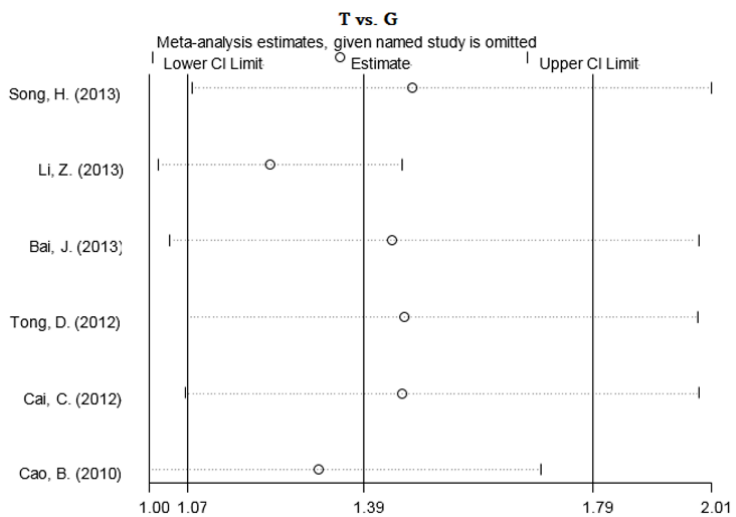

Figure S3: Sensitivity analysis of the pooled ORs and 95% CIs for *TIM-3* -1516G/T polymorphism.

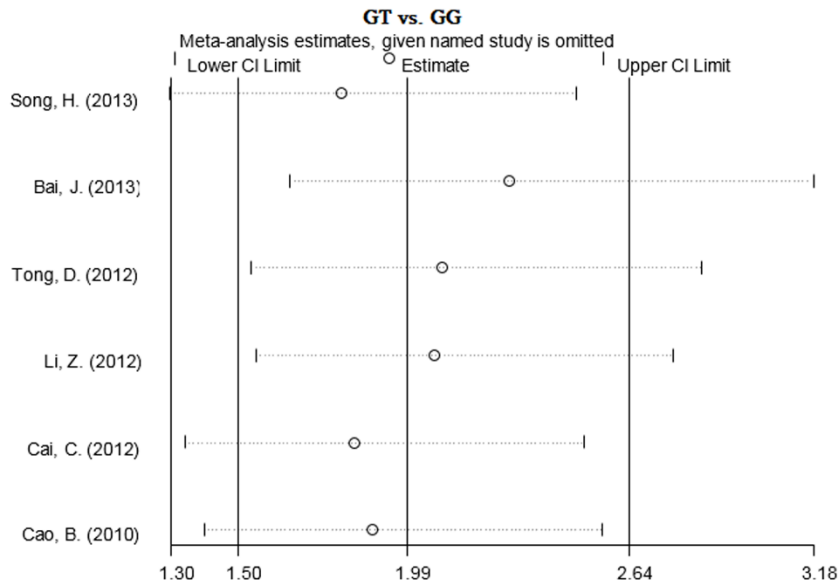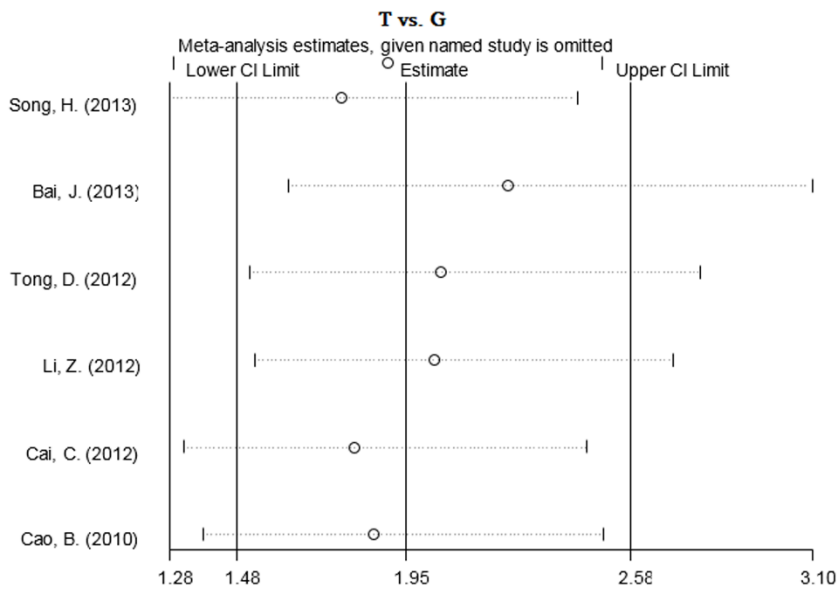

Figure S4: Sensitivity analysis of the pooled ORs and 95% CIs for *TIM-3* -574G/T polymorphism.

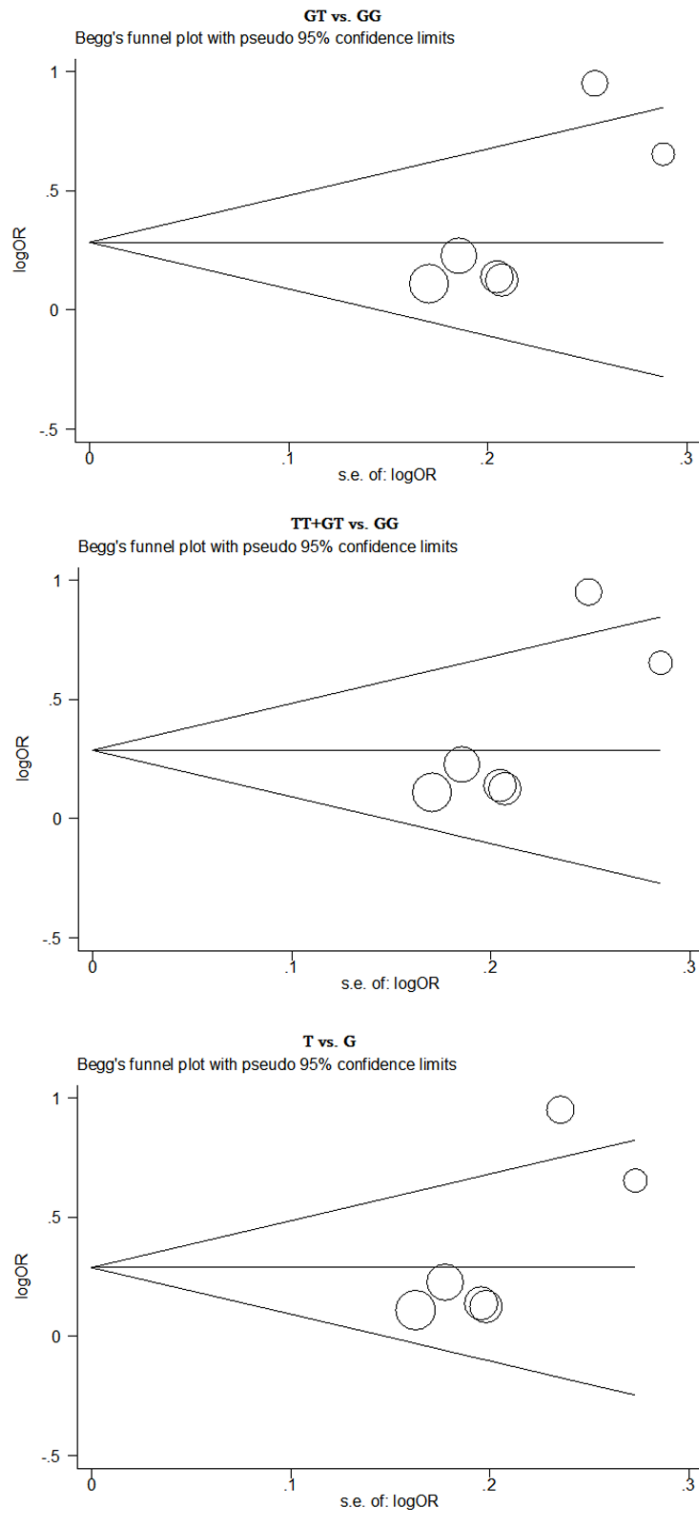

Figure S5: Funnel plot analysis of the association of *TIM-3* -1516G/T polymorphism with overall cancer risk.

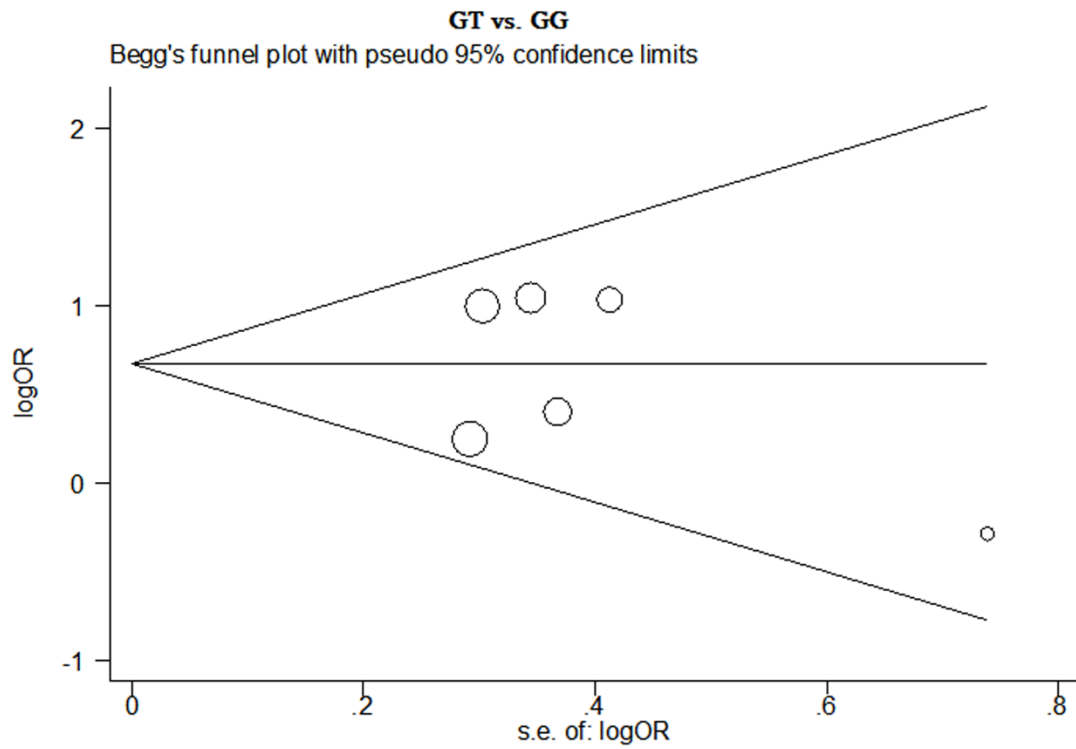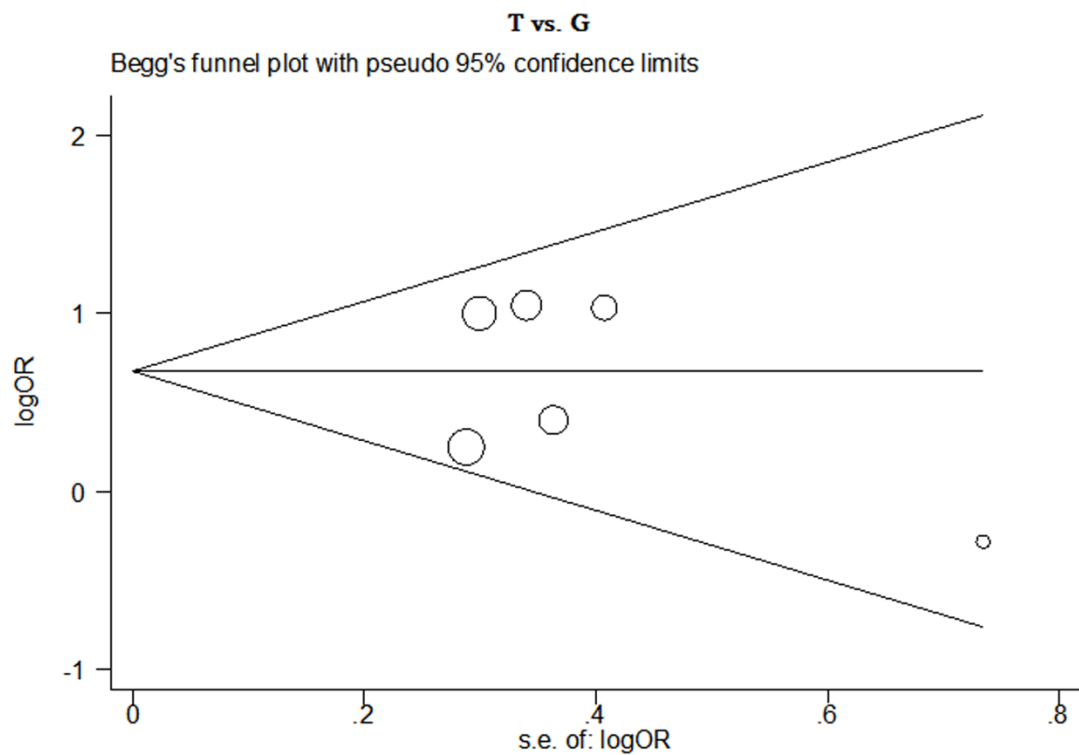

Figure S6: Funnel plot analysis of the association of *TIM-3* -574G/T polymorphism with overall cancer risk.



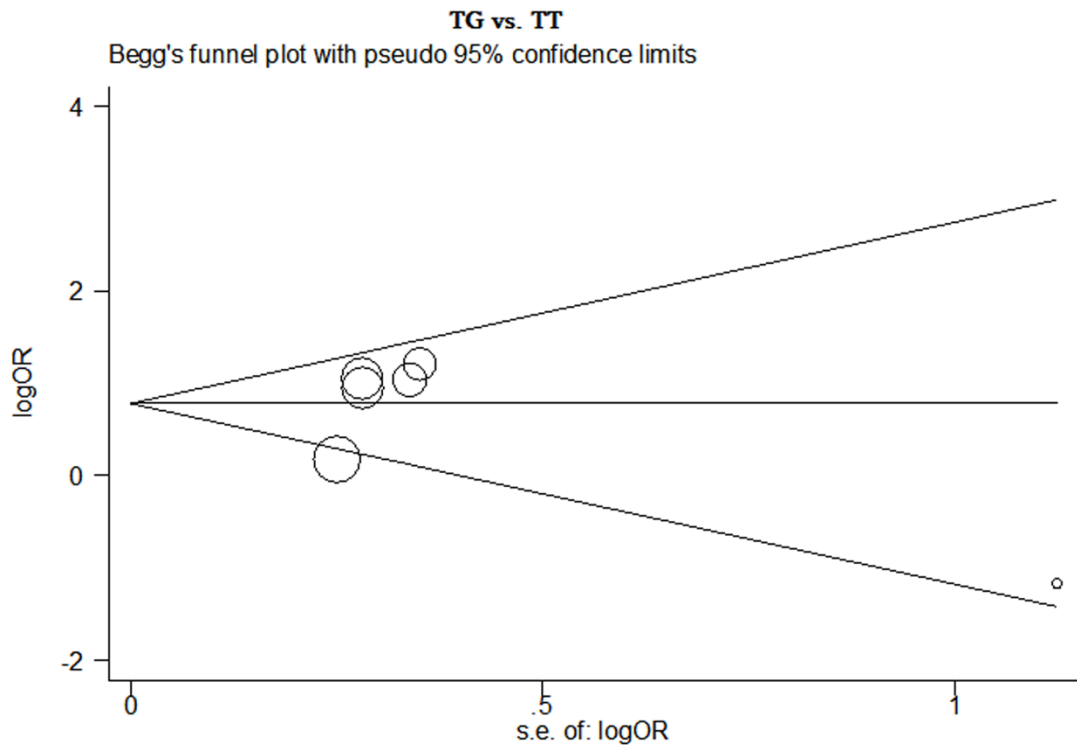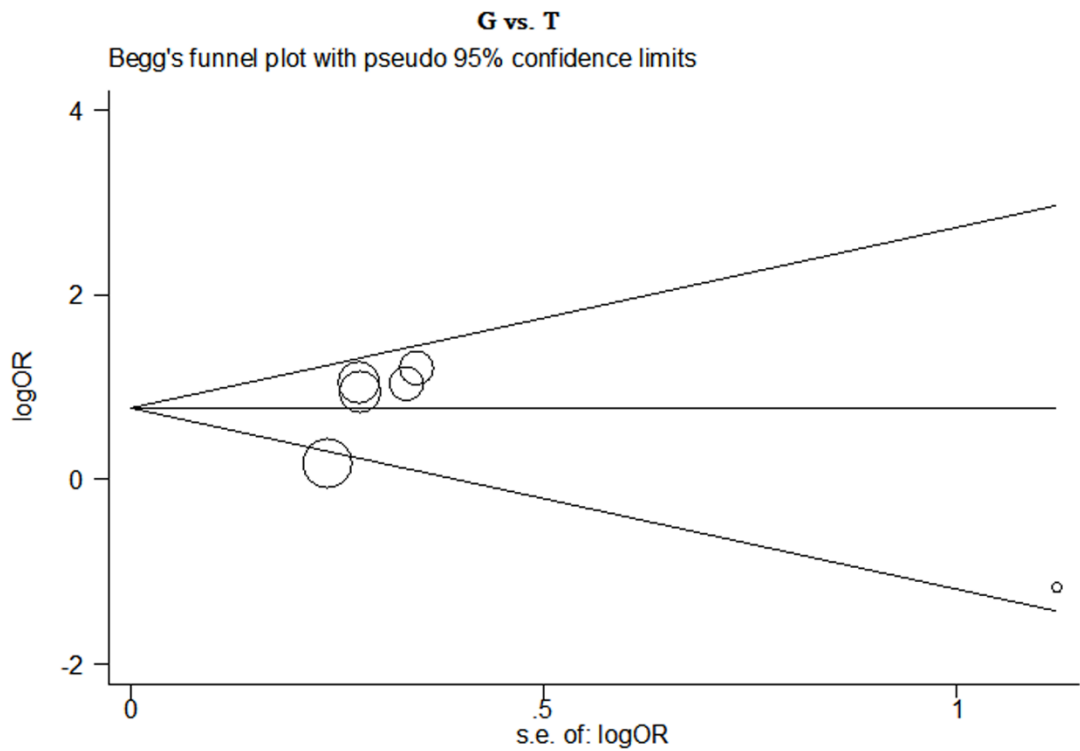

Figure S7: Funnel plot analysis of the association of *TIM-3* +4259T/G polymorphism with overall cancer risk.
